# Supplementary material for: CYP2C19 Genotype‐Guided Antiplatelet Therapy After Percutaneous Coronary Intervention in Diverse Clinical Settings
Source: PubMed Central journal article supplement — J Am Heart Assoc. 2022 Feb 12;11(4):e024159. doi: 10.1161/JAHA.121.024159 (PMC9245803; doi:10.1161/jaha.121.024159), 2022-02-12
Supplement: JAH3-11-e024159-s001.pdf [file JAH3-11-e024159-s001.pdf]

# **SUPPLEMENTAL MATERIAL**

**IGNITE Pharmacogenetics Working Group members:**

Amber Beitelshes, Amanda Elsey, Ann Holmes, Almut Winterstein, Amber Cipriani, Amy Pasterna, Aniwaa Owusu-Obeng, Ben Duong, Brittney Davis, Brian Decker, Christina Aquilante, James Cimino, Cindy Prows, Craig Lee, Caitrin McDonough, Dan Crona, Deepak Voora, Rhonda Cooper-DeHoff, Devon Nwaba, Donna Messersmith, Ebony Madden, Emily Cicali, Edith Nutescu, Geoffrey Ginsburg, Gillian Bell, Yan Gong, Grant Wood, Henry Ong, Pamala Jacobson, James Franciosi, Kevin Hicks, James Lee, John Lima, Josh Peterson, Jeffrey Bishop, Julie Johnson, Julio Duarte, Kathryn Blake, Kendra Grande, Kristin Maloney, Kristen Weitzel, Laura Ramsey, Laura Wiley, Larisa Cavallari, Lindsay Hines, Linda Jeng, Nicole Lockhart, Matthew Rutledge, Max Smith, Michael Michalkiewicz, Michelle Cohen, Michelle Liu, May Montasser, Jessie Modlin, Melissa Polasek, Marc Rosenman, Mark Vesely, Natasha Petry, Nazneen Aziz, Nita Limdi, Pamela Smith, Pamela Williams, Phil Empey, Suzanne Poulson, Ruth Cosentino, Rick Stouffer, Rolf Peter Kreutz, Sara Van Driest, Sony Tuteja-Stevens, Stacy Paris, Jim Stevenson, Tameka Suber, Teji Rakhra-Burris, Todd Skaar, Tyler Koep, Valerie Baron, Vidya Chidambaran, Vivian Pan, Victoria Pratt, Mark Wagner, Yee Ming Lee

**Table S1. CYP2C19 Genotyping Platform and Alleles Detected at Each Institution.**

| <b>Institution</b>                           | <b>Genotyping Platform</b>                                        | <b>Alleles</b>                               | <b>Indication for Genotyping</b>                                                                                                                                                                                           |
|----------------------------------------------|-------------------------------------------------------------------|----------------------------------------------|----------------------------------------------------------------------------------------------------------------------------------------------------------------------------------------------------------------------------|
| University of Florida,<br>Gainesville        | GenMark Diagnostics, Inc.<br>eSensor technology<br>(Carlsbad, CA) | *2, *3, *4, *5, *6, *8,<br>*9, *10, *13, *17 | Year 1: left heart<br>catheterization.<br>After Year 1: PCI for ACS or<br>stable CAD                                                                                                                                       |
| University of North<br>Carolina, Chapel Hill | Life Technologies™<br>Taqman® (custom assay)                      | *2, *3, *17                                  | Ordered per interventional<br>cardiologist discretion post-PCI<br>for an ACS indication or a non-<br>ACS indication with high-risk<br>anatomic findings                                                                    |
| University of Maryland,<br>Baltimore         | Life Technologies™<br>Taqman® (custom assay)                      | *2, *3, *4, *6, *8, *17                      | Year 1: Left heart<br>catheterization.<br>After Year 1: Part of post-PCI<br>order set (optional). Ordered<br>per interventional cardiologist<br>discretion for an ACS<br>indication or “high-risk” non-<br>ACS indication. |
| University of<br>Pennsylvania                | Spartan RX, Spartan<br>Bioscience Inc.<br>(Ottawa, ON)            | *2, *3, *17                                  | Ordered as part of a prospective<br>clinical implementation trial.<br>(PMID: 31928229)                                                                                                                                     |

|                                        |                                                                   |                                              |                                                                                                                                                                   |
|----------------------------------------|-------------------------------------------------------------------|----------------------------------------------|-------------------------------------------------------------------------------------------------------------------------------------------------------------------|
| University of Florida,<br>Jacksonville | Spartan RX, Spartan<br>Bioscience Inc.<br>(Ottawa, ON)            | *2, *3, *17                                  | Ordered as part of a prospective<br>clinical implementation trial of<br>patients undergoing LHC with<br>intent to undergo PCI.                                    |
| University of Alabama,<br>Birmingham   | Spartan RX, Spartan<br>Bioscience Inc.<br>(Ottawa, ON)            | *2, *3, *17                                  | Ordered per interventional<br>cardiologist discretion post-PCI<br>for ACS or elective /elective<br>indication based on patient<br>specific determination of risk. |
| University of Pittsburgh               | GenMark Diagnostics, Inc.<br>eSensor technology<br>(Carlsbad, CA) | *2, *3, *4, *5, *6, *7,<br>*8, *9, *10, *17  | Ordered per interventional<br>cardiologist using the post-PCI<br>order set (defaulted; the<br>prescriber could choose to<br>deselect the test).                   |
| University of Illinois,<br>Chicago     | GenMark Diagnostics, Inc.<br>eSensor technology<br>(Carlsbad, CA) | *2, *3, *4, *5, *6, *8,<br>*9, *10, *13, *17 | PCI for ACS or stable CAD<br>(with high-risk anatomic<br>findings)                                                                                                |
| Indiana University                     | Life Technologies™<br>Taqman® (custom assay)                      | *2, *3, *4, *4B, *6, *8,<br>*10, *17         | PCI for ACS or stable CAD                                                                                                                                         |

**Table S2. Patient Characteristics after Adjustment for Stabilized Inverse Probability of Treatment Weights**

| Characteristic                              | LOF-Clopidogrel (n=460) | LOF-Alternative (n=571) | Standardized Difference* | Non-LOF-Clopidogrel (n=1891) | Non-LOF-Alternative (n=372) | Standardized Difference* |
|---------------------------------------------|-------------------------|-------------------------|--------------------------|------------------------------|-----------------------------|--------------------------|
| Age, years                                  | 62 ± 12                 | 62 ± 11                 | 0.004                    | 63 ± 12                      | 63 ± 11                     | 0.007                    |
| Female                                      | 145 (32)                | 178 (31)                | 0.008                    | 612 (32)                     | 122 (33)                    | 0.012                    |
| Race                                        |                         |                         |                          |                              |                             |                          |
| White                                       | 323 (70)                | 403 (71)                | 0.011                    | 1407 (74)                    | 274 (74)                    | 0.02                     |
| Black                                       | 104 (23)                | 127 (22)                |                          | 354 (19)                     | 73 (20)                     |                          |
| Other                                       | 32 (7)                  | 41 (7)                  |                          | 129 (7)                      | 26 (7)                      |                          |
| BMI, kg/m <sup>2</sup>                      | 30 ± 7                  | 30 ± 7                  | 0.007                    | 30 ± 6                       | 30 ± 6                      | 0.024                    |
| Current Smoker                              | 146 (32)                | 178 (31)                | 0.011                    | 540 (29)                     | 111 (30)                    | 0.029                    |
| ACS indication for PCI                      | 320 (70)                | 396 (69)                | 0.006                    | 1302 (69)                    | 257 (69)                    | 0.004                    |
| Drug-eluting stent                          | 387 (84)                | 483 (85)                | 0.009                    | 1647 (87)                    | 320 (86)                    | 0.027                    |
| Medical history                             |                         |                         |                          |                              |                             |                          |
| Diabetes                                    | 180 (39)                | 220 (39)                | 0.013                    | 782 (41)                     | 160 (43)                    | 0.032                    |
| Hypertension                                | 365 (80)                | 451 (79)                | 0.012                    | 1538 (81)                    | 306 (83)                    | 0.028                    |
| Dyslipidemia                                | 323 (70)                | 401 (70)                | 0.002                    | 1309 (69)                    | 269 (72)                    | 0.067                    |
| CKD                                         | 147 (32)                | 180 (32)                | 0.013                    | 501 (27)                     | 102 (28)                    | 0.021                    |
| MI                                          | 128 (28)                | 156 (27)                | 0.009                    | 482 (26)                     | 99 (27)                     | 0.028                    |
| Coronary stent                              | 104 (23)                | 126 (22)                | 0.016                    | 443 (23)                     | 99 (27)                     | 0.072                    |
| Stroke/TIA                                  | 49 (11)                 | 60 (10)                 | 0.01                     | 172 (9)                      | 29 (8)                      | 0.044                    |
| PVD                                         | 51 (11)                 | 64 (11)                 | 0.001                    | 167 (9)                      | 23 (6)                      | 0.097                    |
| Heart failure                               | 75 (16)                 | 93 (16)                 | 0.004                    | 287 (15)                     | 62 (17)                     | 0.039                    |
| Atrial fibrillation                         | 43 (9)                  | 52 (9)                  | 0.004                    | 154 (8)                      | 35 (9)                      | 0.043                    |
| Gastrointestinal or intracranial hemorrhage | 22 (5)                  | 28 (5)                  | 0.002                    | 52 (3)                       | 18 (5)                      | 0.105                    |
| Cancer                                      | 21 (5)                  | 26 (5)                  | 0.004                    | 104 (6)                      | 19 (5)                      | 0.011                    |
| Discharge medication                        |                         |                         |                          |                              |                             |                          |
| Aspirin                                     | 450 (98)                | 559 (98)                | 0.001                    | 1846 (98)                    | 364 (98)                    | 0.027                    |
| Statin                                      | 438 (95)                | 543 (95)                | 0.002                    | 1777 (94)                    | 351 (94)                    | 0.015                    |
| ACE inhibitor or ARB                        | 310 (68)                | 386 (68)                | 0.001                    | 1259 (67)                    | 237 (64)                    | 0.057                    |
| β-blocker                                   | 382 (83)                | 475 (83)                | <0.001                   | 1626 (86)                    | 318 (86)                    | 0.011                    |
| Anticoagulant                               | 41 (9)                  | 48 (8)                  | 0.015                    | 168 (9)                      | 38 (10)                     | 0.044                    |

Values are mean ± SD or n (%). \* Weighted absolute standardized differences were calculated using stabilized inverse probability of treatment weighting.

**Figure S1. Antiplatelet therapy in poor metabolizers (PMs), intermediate metabolizers (IMs), and patients without a loss-of-function allele.**

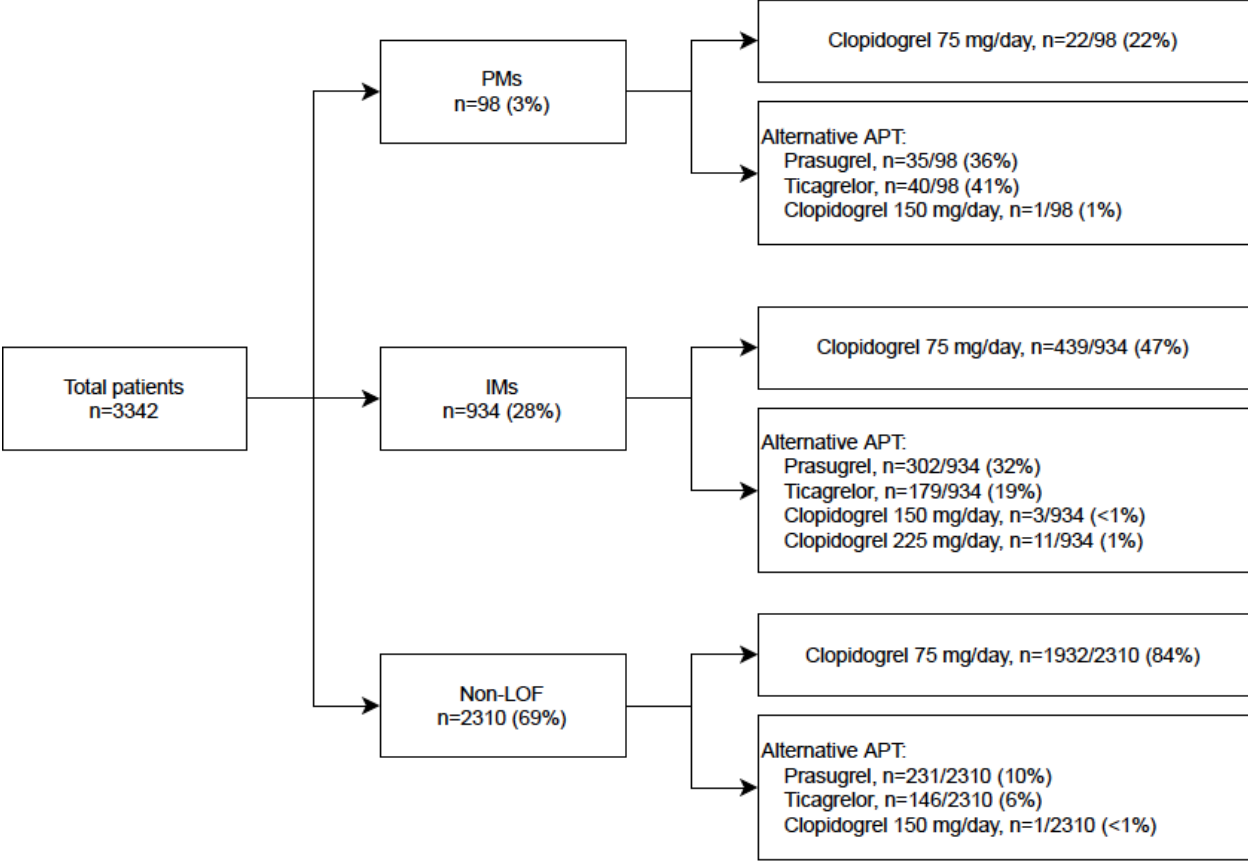

APT, antiplatelet therapy; IM, intermediate metabolizer; LOF, loss-of-function; PM, poor metabolizer.
